# Supplementary material
Source: PubMed Central journal article supplement (PMC2989538)

**ESM Fig. 1 Flow diagram**

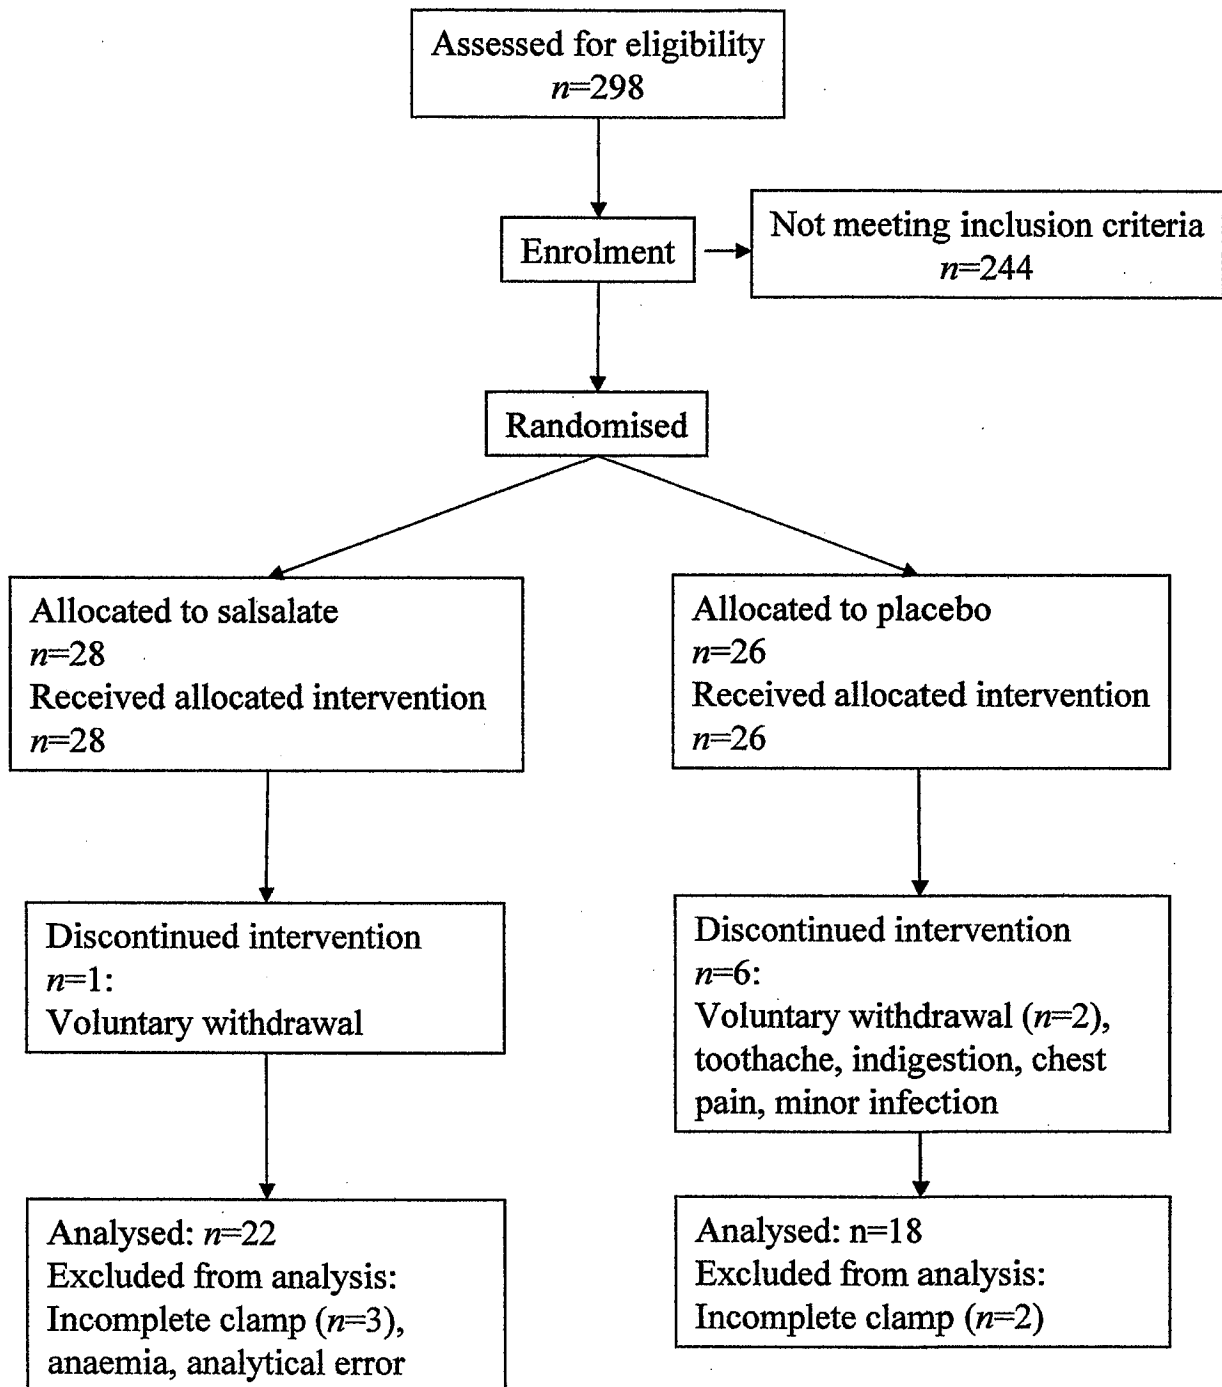

Supplement: NIHMS114933-supplement-ESM_Figure.pdf [file NIHMS114933-supplement-ESM_Figure.pdf]
